# Supplementary material for: In-plate toxicometabolomics of single zebrafish embryos
Source: Royal Society of Chemistry journal article supplement (doi:10.1039/d0mo00007h), 2020-03-06

**301.21689\_9.4\_NCE35\_1.4e+08\_07\_QC#2\_C18**

**301.21689\_9.4\_NCE35\_2.5e+08\_04\_Std\_C18**

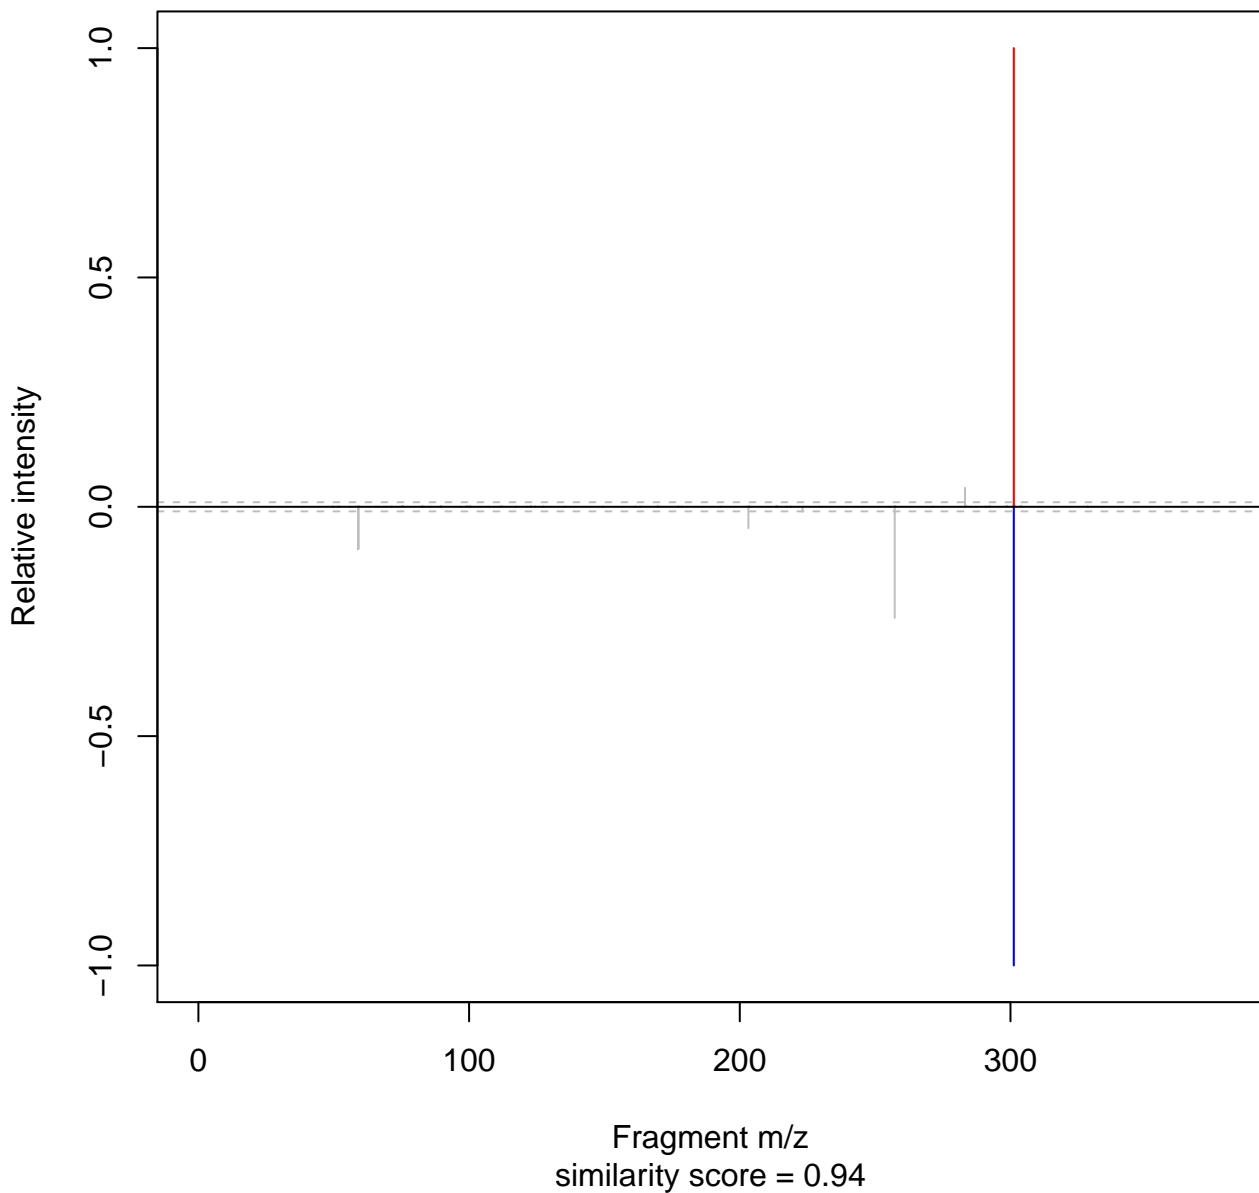

319.22751\_8.3\_NCE35\_1.6e+06\_07\_QC#2\_C18

319.22751\_8.3\_NCE35\_1.2e+07\_05\_IDstd#2\_C18

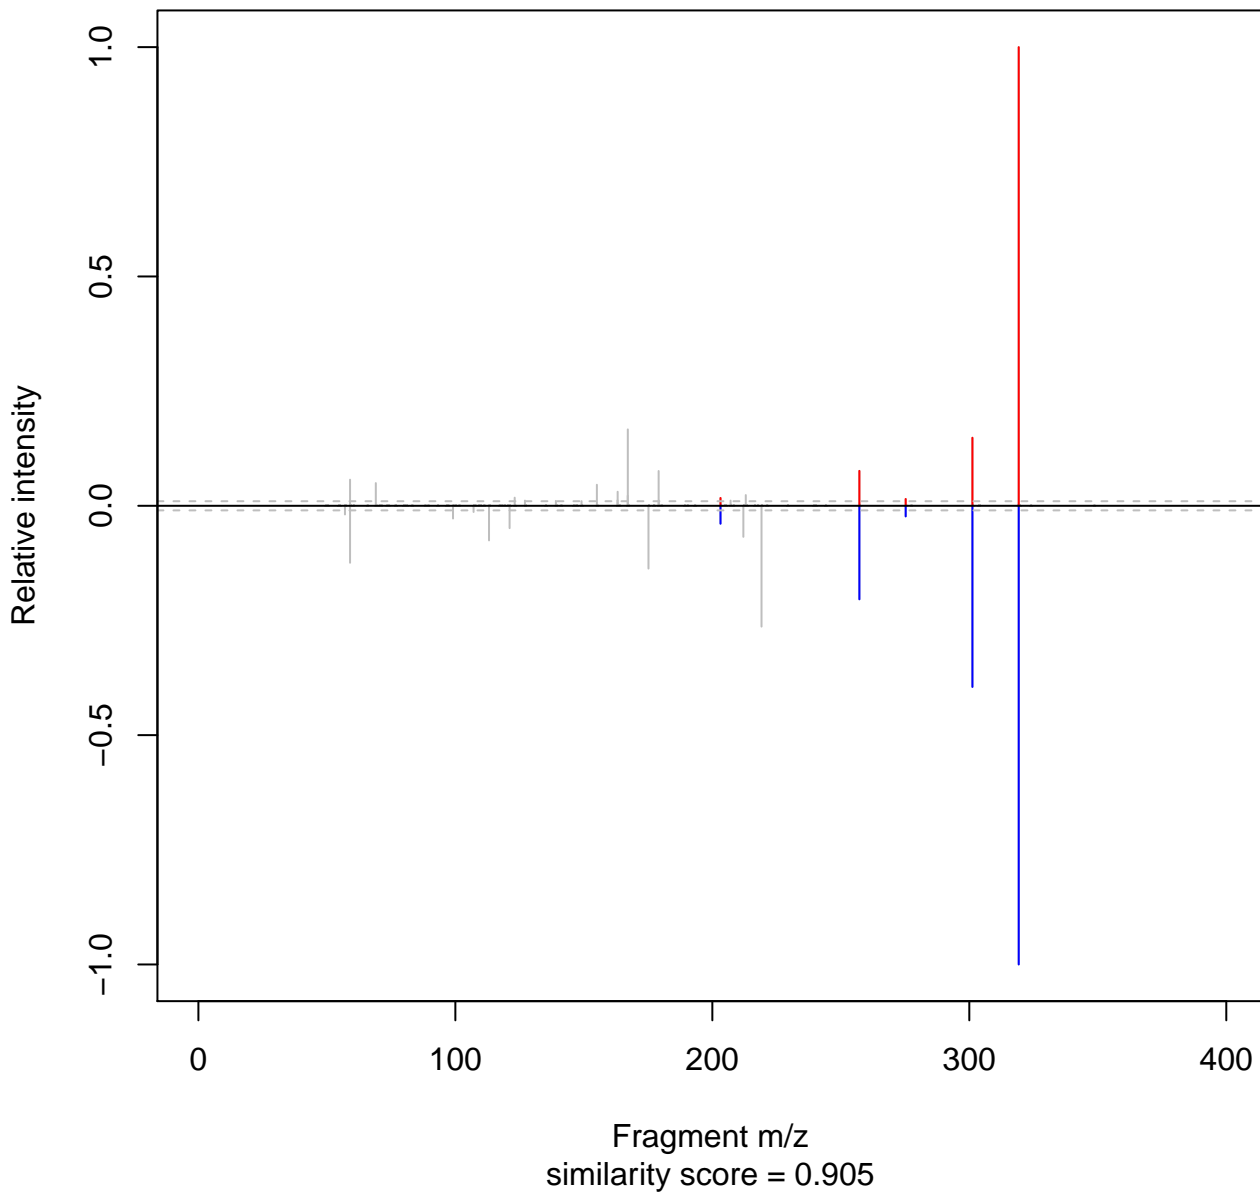

327.23218\_9.9\_NCE35\_4.3e+07\_07\_QC#2\_C18

327.23218\_9.9\_NCE35\_2.0e+09\_05\_IDstd#2\_C18

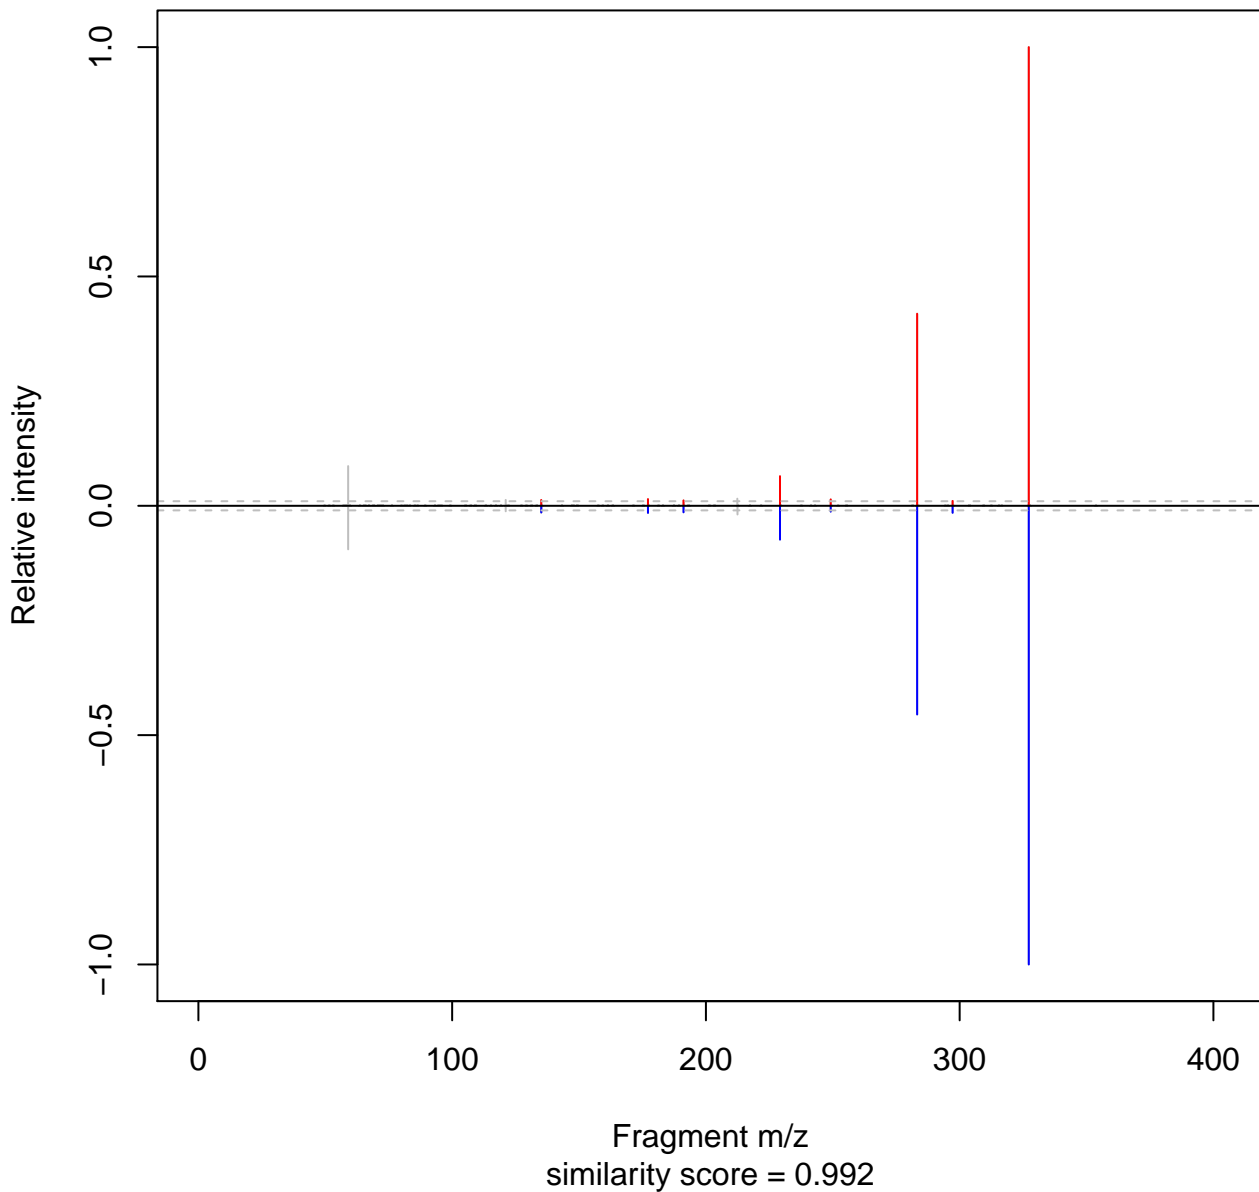

329.24847\_10.1\_NCE35\_1.7e+07\_07\_QC#2\_C18

329.24847\_10.1\_NCE35\_1.1e+08\_04\_Std\_C18

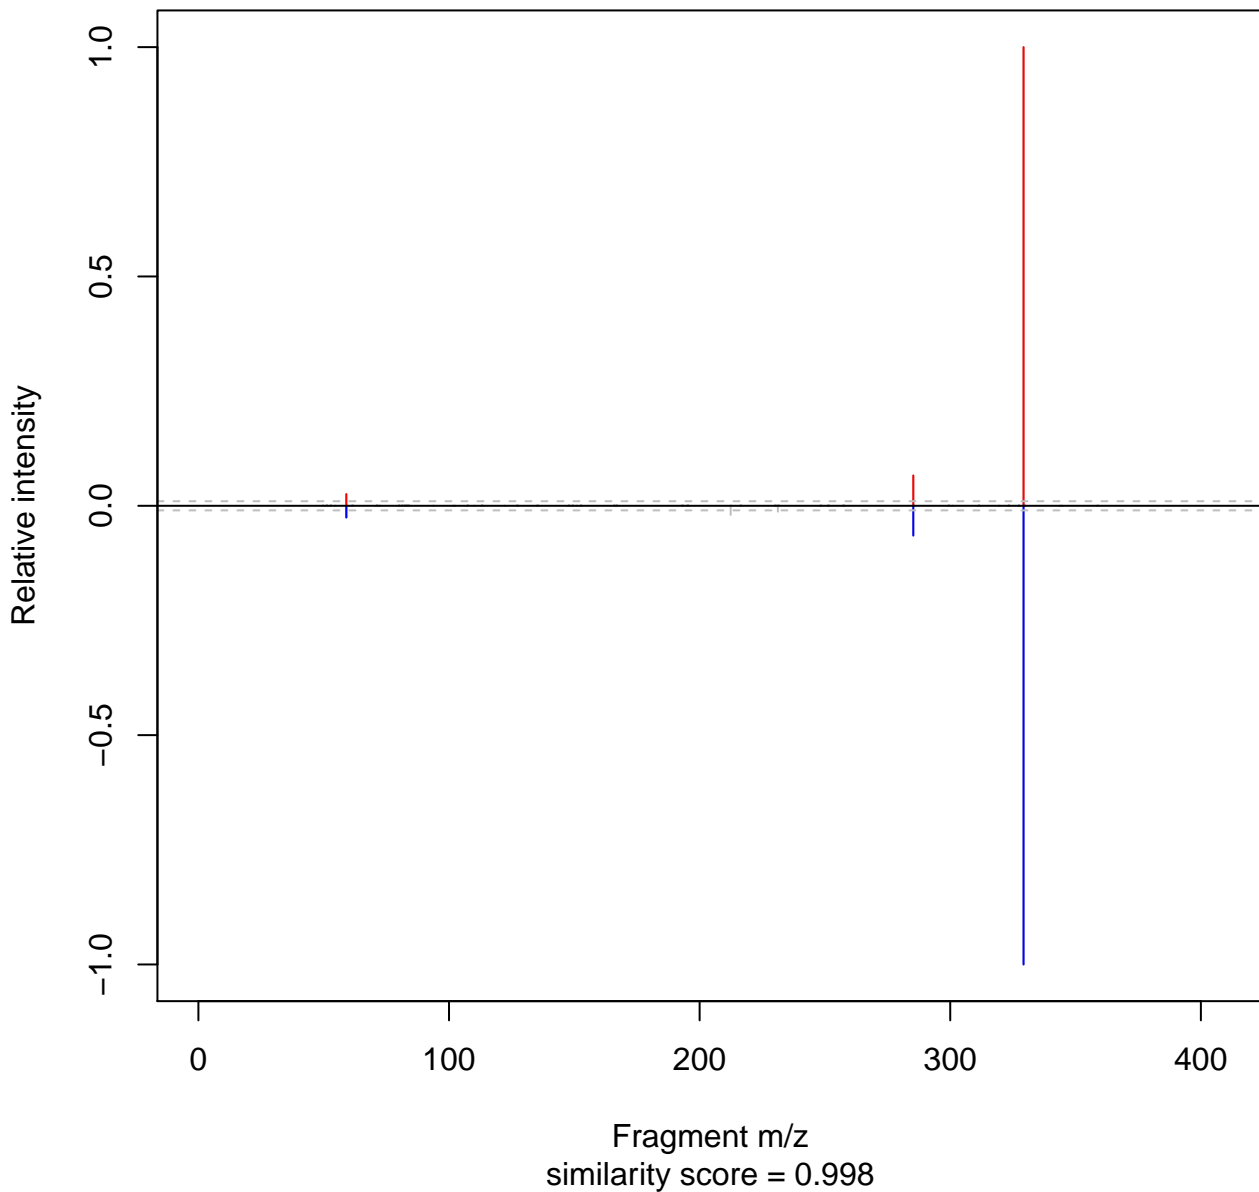

690.50806\_13.5\_NCE35\_4.0e+05\_07\_QC#2\_C18

690.50806\_13.5\_NCE35\_6.9e+07\_04\_Std\_C18

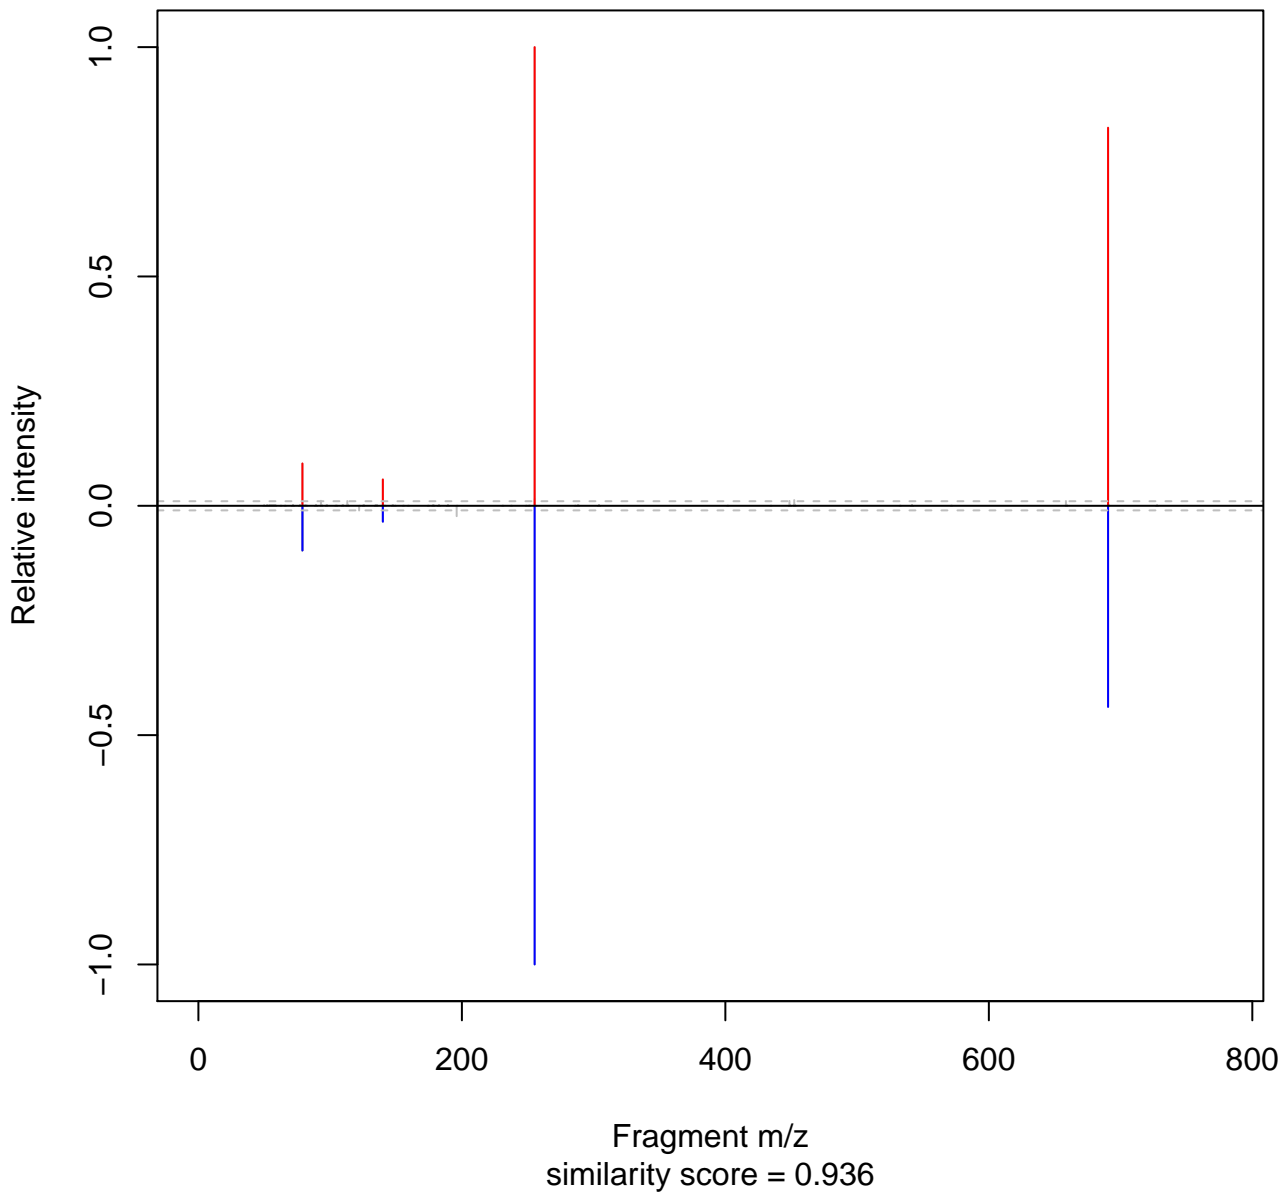

714.50769\_12.5\_NCE35\_2.4e+05\_07\_QC#2\_C18

714.50769\_12.5\_NCE35\_6.9e+07\_05\_IDstd#2\_C18

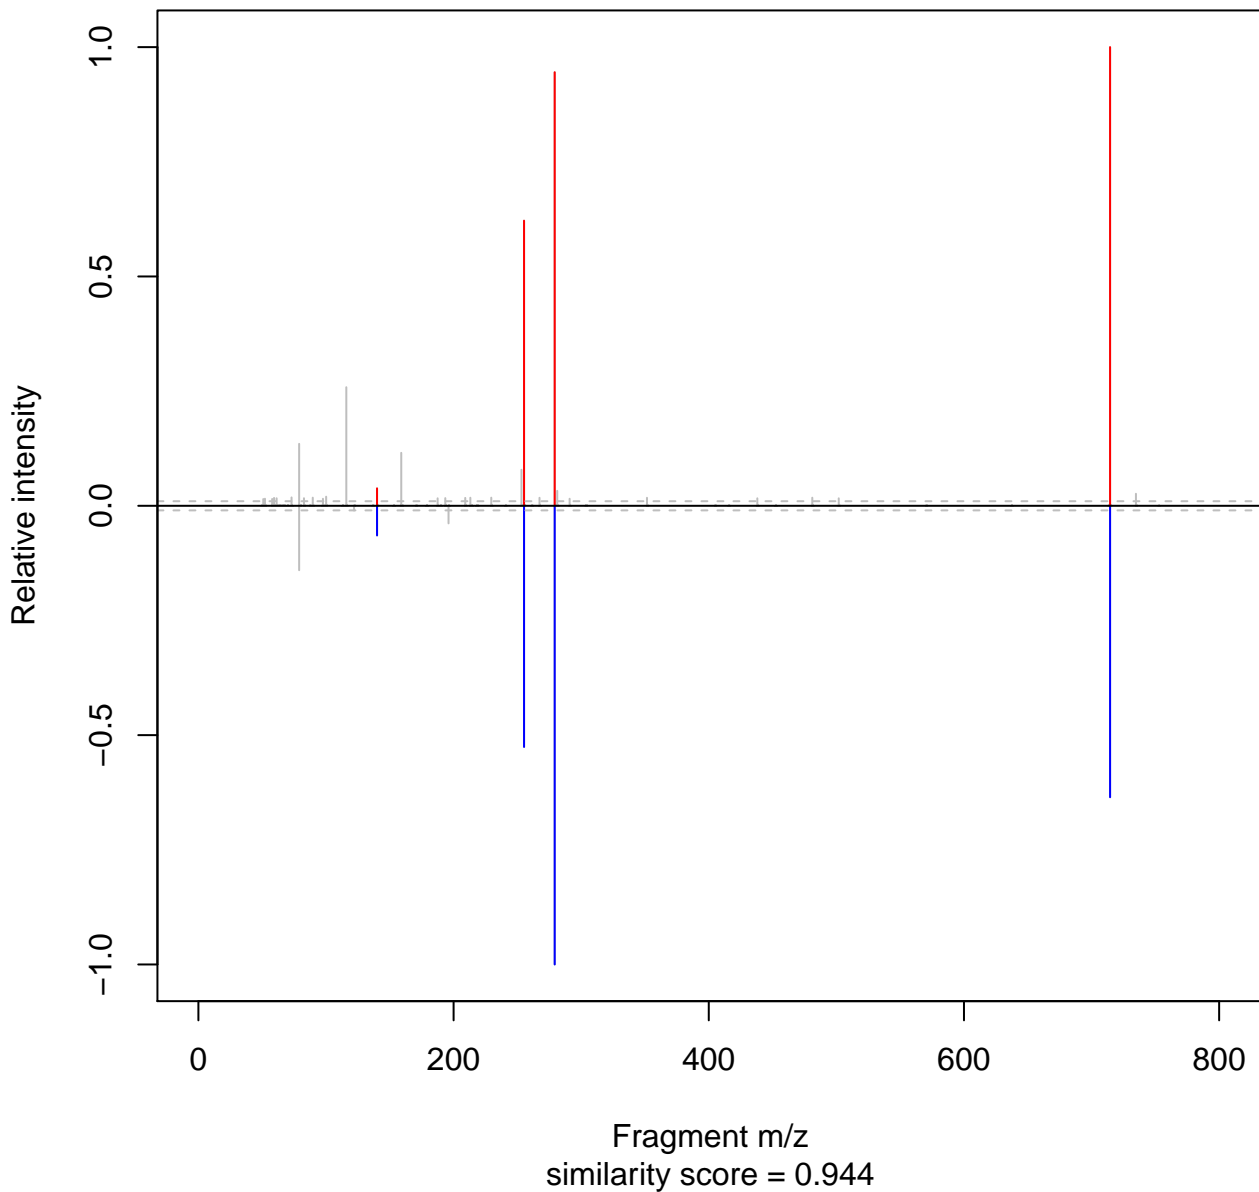

716.523032\_3.2\_NCE35\_5.7e+05\_07\_QC#2\_C18

716.523032\_3.2\_NCE35\_4.5e+07\_04\_Std\_C18

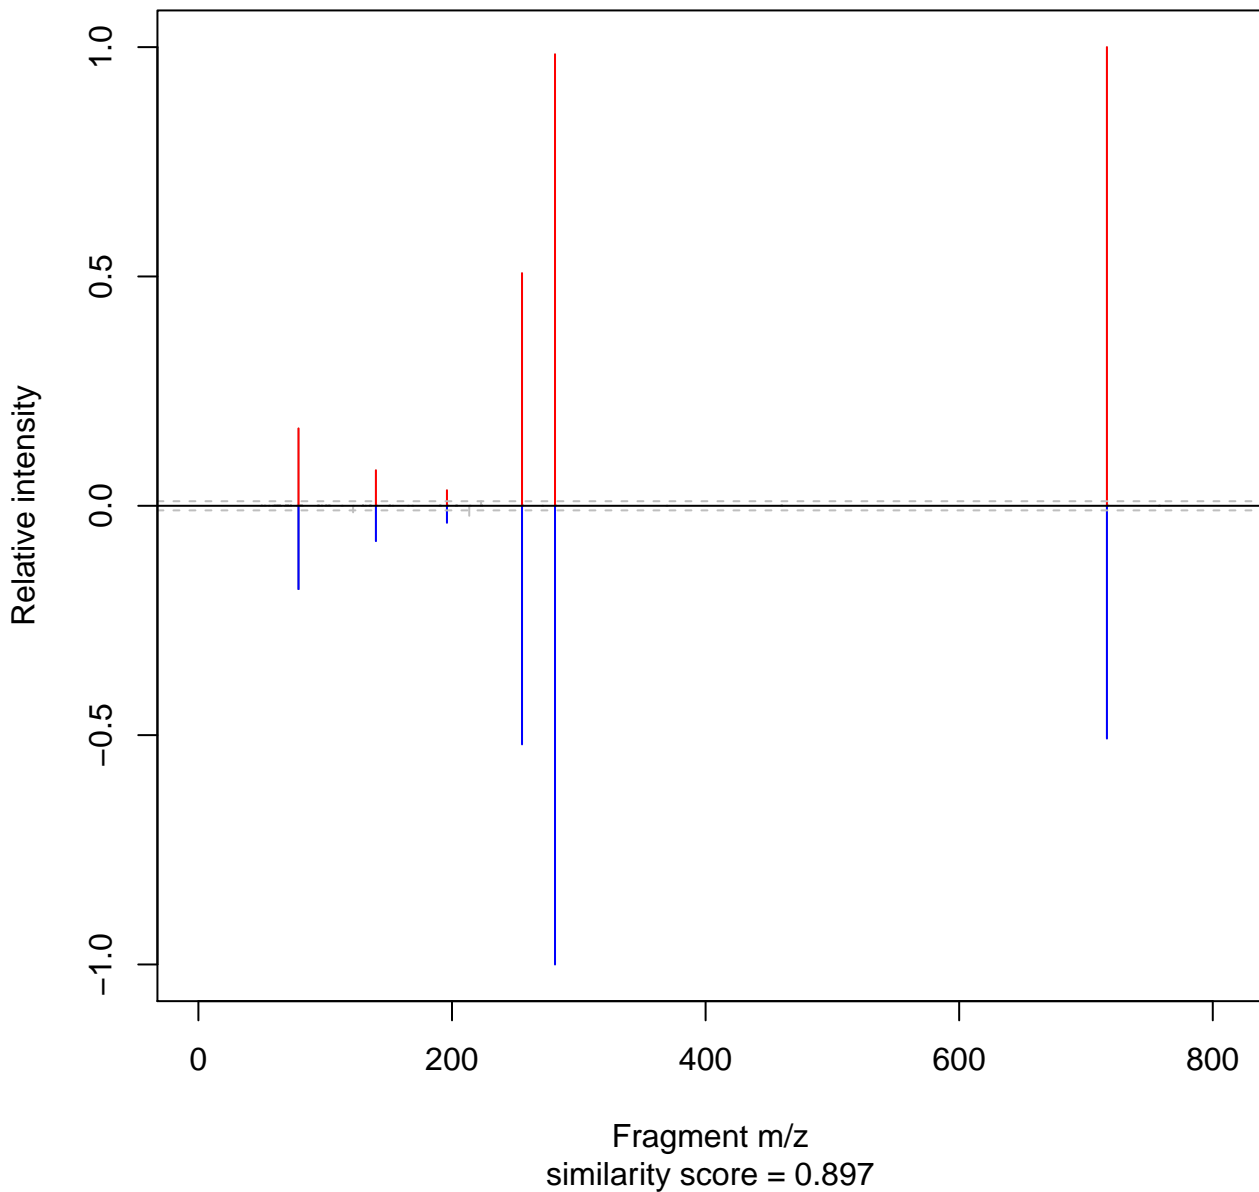

120.08073\_3.9\_NCE26.67\_1.0e+07\_06\_QC#1\_HILIC

120.08073\_3.9\_NCE26.67\_5.9e+08\_04\_IDstd\_HILIC

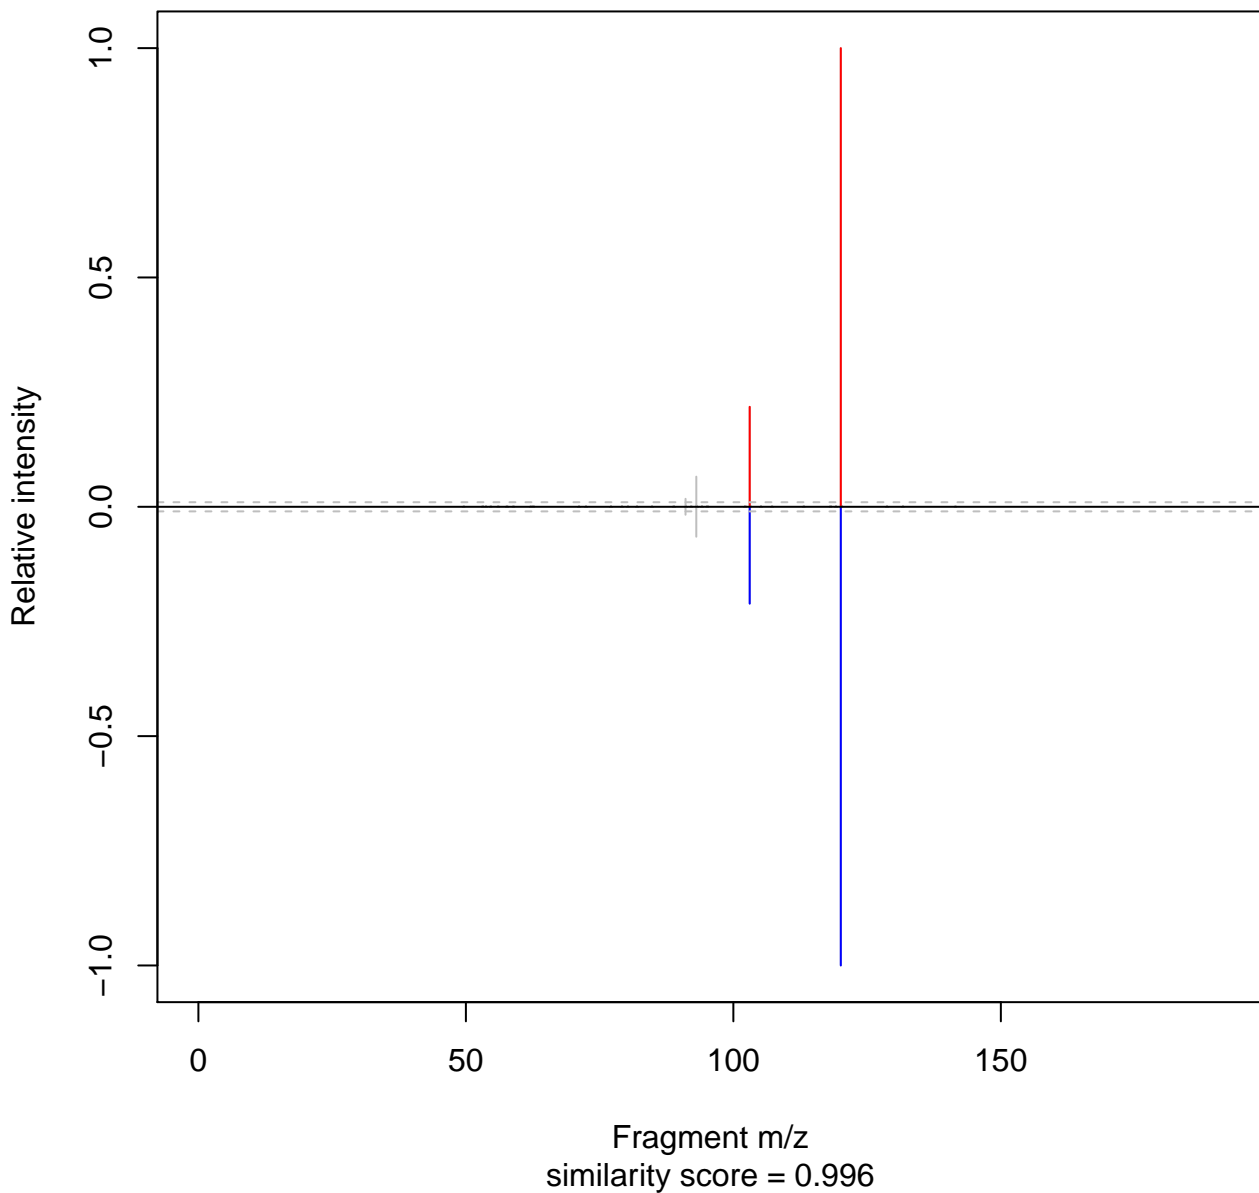



166.0861\_3.9\_NCE26.67\_4.4e+06\_06\_QC#1\_HILIC

166.0861\_3.9\_NCE26.67\_7.5e+09\_04\_IDstd\_HILIC

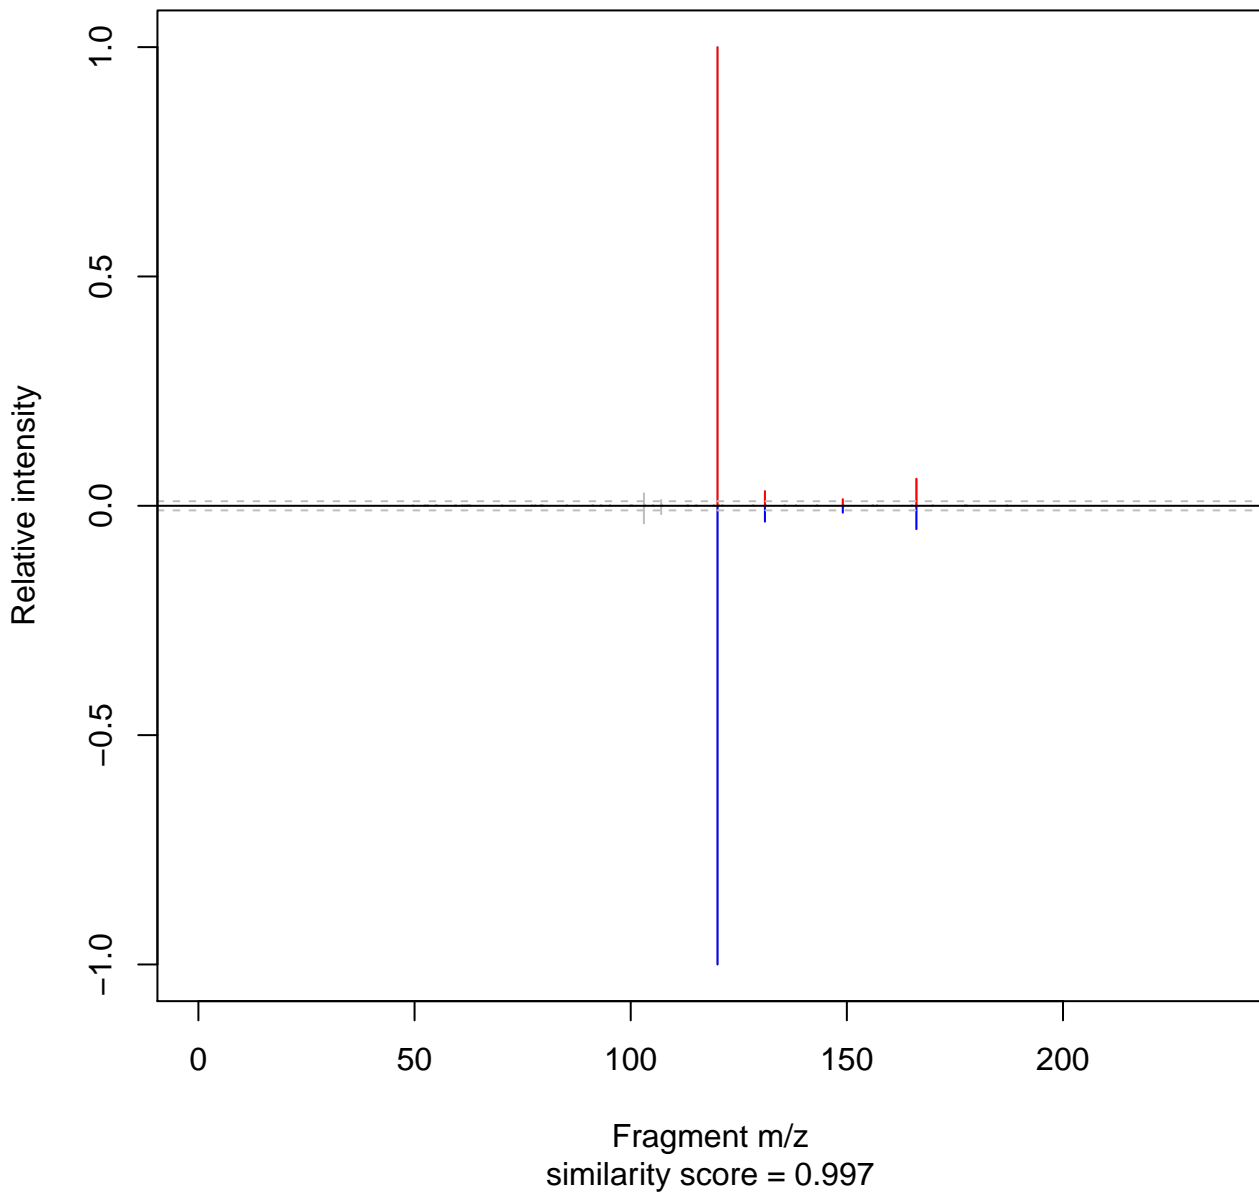

454.29306\_3.4\_NCE26.67\_3.2e+06\_06\_QC#1\_HILIC

454.29306\_3.4\_NCE26.67\_1.8e+07\_04\_IDstd\_HILIC

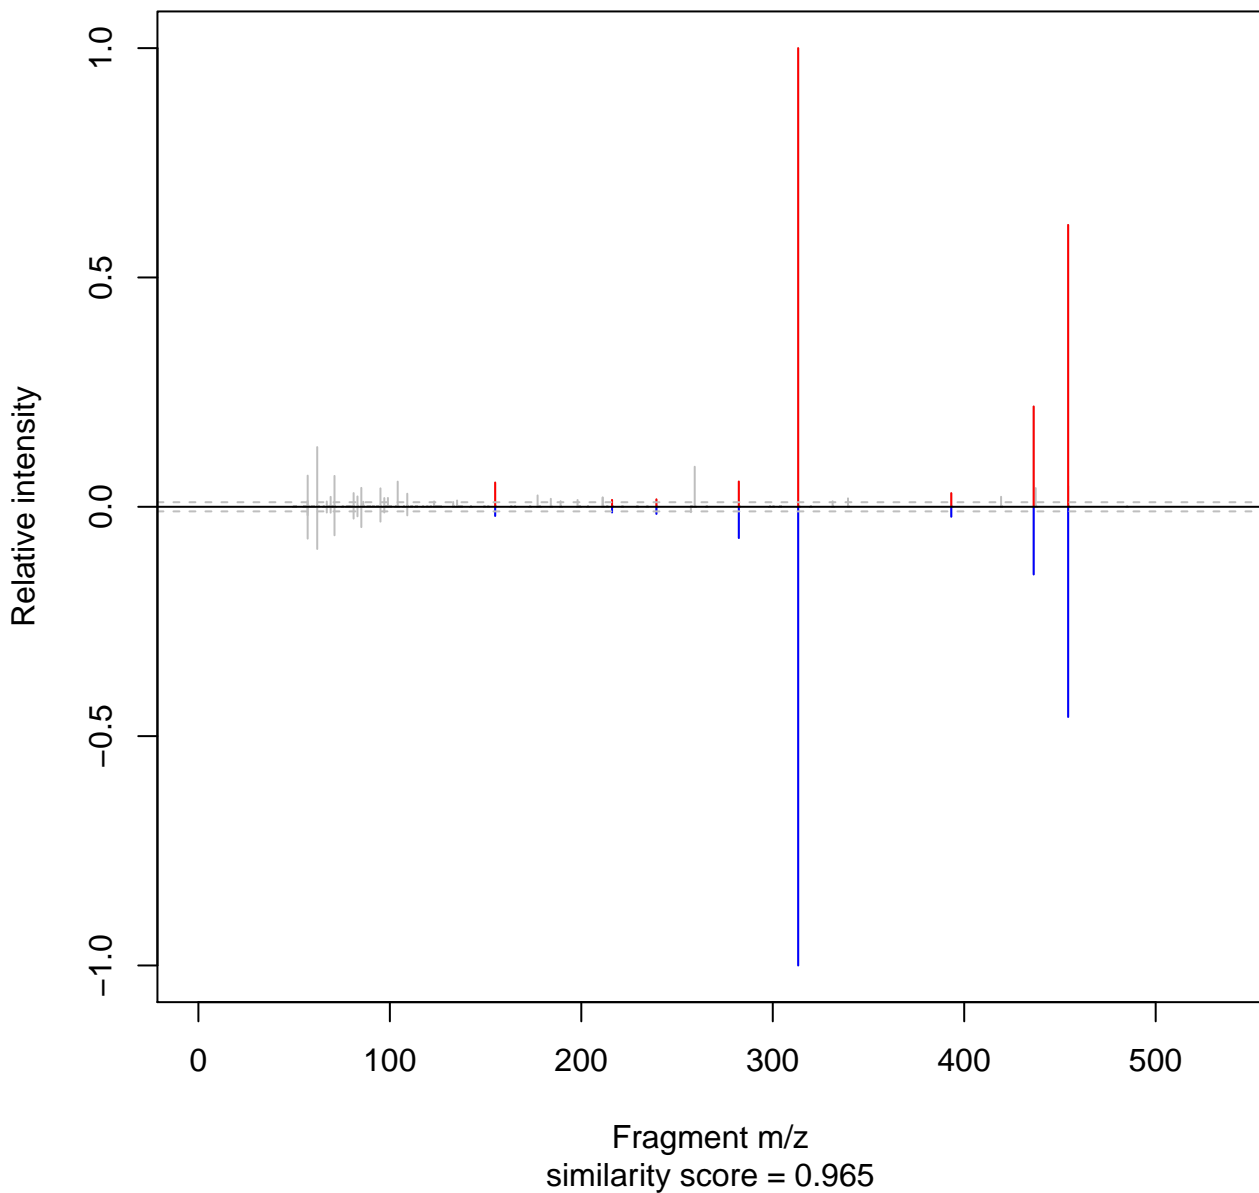

716.523032\_3.1\_NCE26.67\_2.6e+06\_06\_QC#1\_HILIC

716.523032\_3.1\_NCE26.67\_1.3e+08\_04\_IDstd\_HILIC

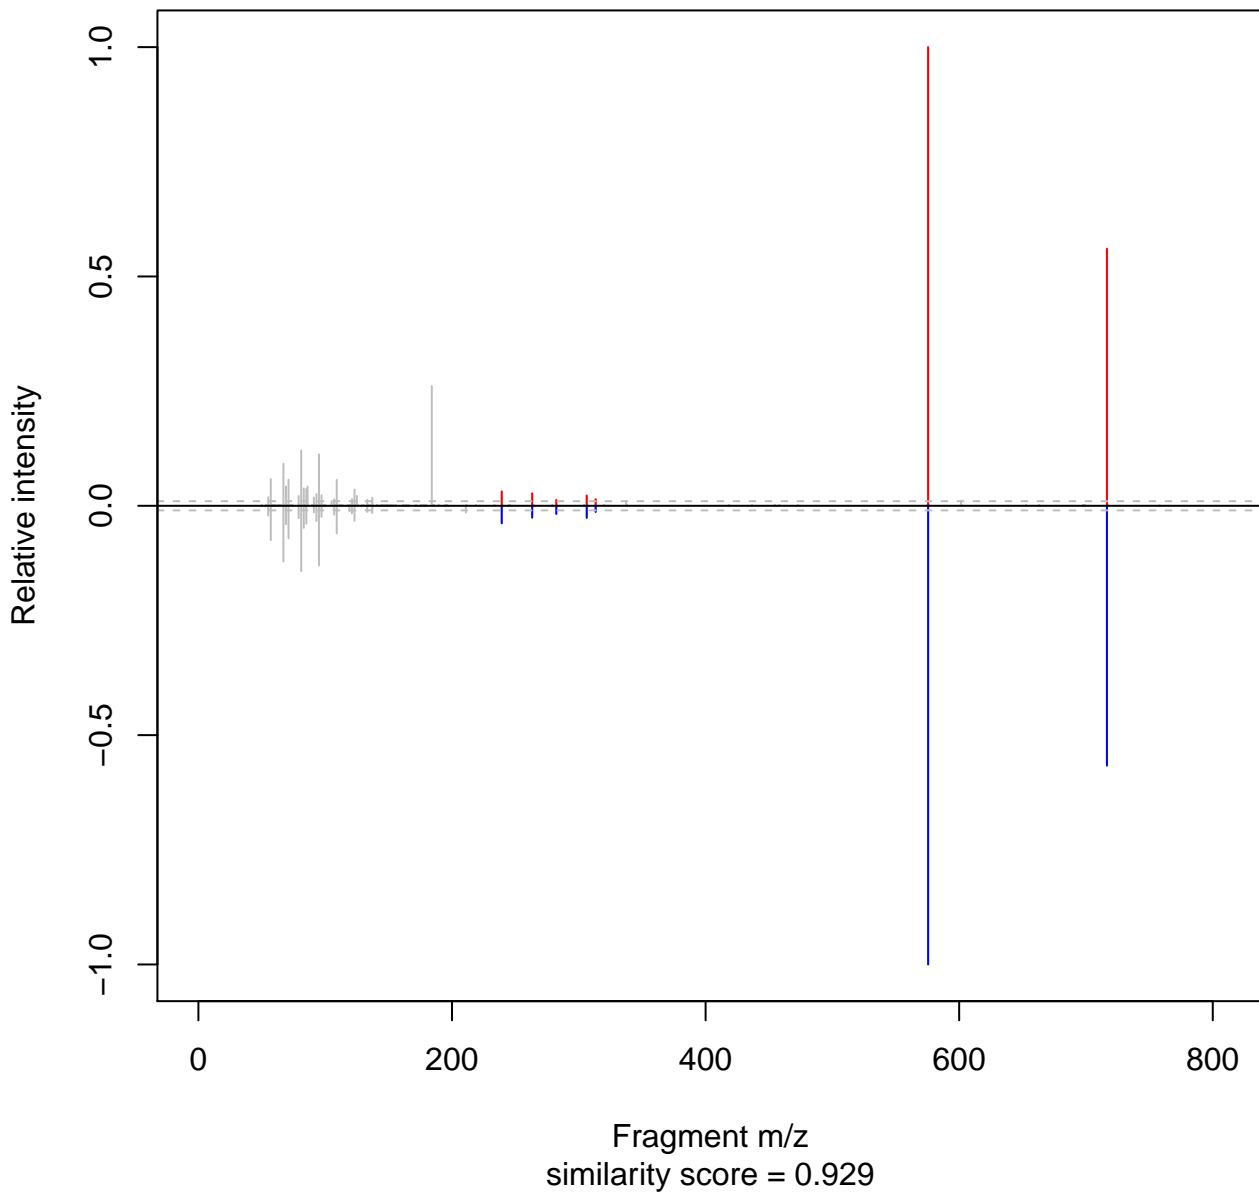

Supplement: d0mo00007h1.pdf [file d0mo00007h1.pdf]
