# Supplementary material for: In-plate toxicometabolomics of single zebrafish embryos
Source: Royal Society of Chemistry journal article supplement (doi:10.1039/d0mo00007h), 2020-03-06
Supplement: d0mo00007h3.xlsx [file d0mo00007h3.xlsx]

## Sheet: Table S1
Supplementary Table 1. Raw data for all apical endpoints
		48 hpf																						120 hpf
		Lethal criteria				Sublethal / developmental criteria							Teratogenic criteria										Hatching	Lethal criteria				Sublethal / developmental criteria							Teratogenic criteria										Hatching
Plate well	Dose	Coagulation	Tail not detached	No somites	No heart-beat	Completion of gastrula	Formation of somites	Development of eyes	Spontaneous movement	Heart beat/blood circulation (beat/15seconds)	Pigmentation	Oedema	Teratogenic	Malformation of head				modified structure of the corda	scoliosis	rachischisis	deformity of yolk	growth-retardation		Coagulation	Tail not detached	No somites	No heart-beat	Completion of gastrula	Formation of somites	Development of eyes	Spontaneous movement	Heart beat/blood circulation (beats/15 seconds)	Pigmentation	Oedema	Teratogenic	Malformation of head				modified structure of the corda	scoliosis	rachischisis	deformity of yolk	growth-retardation
															sacculi/otoliths	tail	heart																				sacculi/otoliths	tail	heart
A1	3,4-DCA	Y																						Y
A2										31		Y										Y		Y
A3										31		Y									Y								~	small		20		Y		Y		short
A4										43	Red	Y									Y											37	less
A5			Y	Y				Y		21	Y	Y		Y							Y				Y	Y								Y
A6																								Y	Y									Y
A7										26		Y									Y						Y			Y				Y		Y
A8										44		Y									Y											47
A9			Y							31		Y									Y						Y							Y		Y
A10			Y							41												Y										53
A11		Y																						Y
A12										44													H									55
B1	46,540 µg/L									45													H									42
B2										41													H	Y
B3										38													H									37
B4										43													H									37
B5										40													H									37	less
B6										40													H									40
B7										38													H	Y
B8										39													H									44
B9										38																						45
B10										37													H									41
B11										42																	Y
B12										40													H									48	less
C1	4,550 µg/L									46													H									38
C2										46													H									38	less
C3										45													H									41
C4										40													H									40	less
C5										40																						40	less
C6										41																						41
C7										43													H									47
C8										44													H	Y
C9										44													H	Y
C10										42													H									44
C11										43													H									44		Y
C12										42													H									51
D1	62 µg/L									47													H									36
D2										46													H									36
D3										48													H									40
D4										43													H									43	less
D5										44													H									44
D6										44													H									45
D7										43													H									47	less
D8										43													H									45
D9										46													H									48
D10										43													H									56
D11										45													H									50
D12										40													H									42
E1	12 µg/L									48													H									39
E2										46													H									40
E3										43													H									38
E4										44													H									41
E5										44													H									45	less
E6										45													H									48	less
E7										41																						46	less
E8										46													H									48
E9										45													H									47
E10										45													H									50
E11										43													H									51
E12										40													H									48
F1	0.49 µg/L									49													H									36
F2										46													H									36
F3										42																						41
F4										44													H									42
F5										40																						44
F6										42																						43	less
F7										44													H									49
F8										41																						47
F9										46													H									47
F10										45													H									53
F11										43																						49
F12										43																						52
G1	0.05 µg/L									45																						35
G2										43																						36
G3										42																						42
G4										44																						43
G5										43																						47
G6										44													H									47
G7										44																						46
G8
G9										43													H									48
G10										46													H									49
G11										42																						54
G12										43													H									52
H1	Control									46																						37
H2										43																						38
H3										44																						41
H4										44																						48	less
H5										42																						44
H6										45																						48
H7										43													H									49
H8										42																						49
H9										44																						49
H10										47																						50
H11										42																						51
H12										43																						53

## Sheet: Table S3
Supplementary Table 3. Measured concentrations of degradation plate at 0, 48 and 120 hpf
Plate well	Conc (µg/L)
0 hpf		Avg	CI95%
CA1	44516.5	44380.2	186.443
CA2	44255.8	Stdev	(+)CI95%
CA3	45819.3	781.838	44566.7
CA4	44087.8	RSD	(-)CI95%
CA5	43644.4	0.0176168	44193.8
CA6	44039.2
CA7	43494.7
CA8	45184.3
48 hpf		Avg	CI95%
CA9	47182.3	47250.4	383.321
CA10	NF	Stdev	(+)CI95%
CA11	45765.4	1503.61	47633.7
CA12	45390.5	RSD	(-)CI95%
CB1	49773.3	0.0318222	46867.1
CB2	46654.7		% Increase from 0 hpf
CB3	47802.7		1.06467
CB4	48183.9
120 hpf		Avg	CI95%
CB5	47015.3	46542	457.952
CB6	48076.4	Stdev	(+)CI95%
CB7	47697	1920.39	47000
CB8	45890.6	RSD	(-)CI95%
CB9	42523.7	0.0412614	46084.1
CB10	45609.4		% Increase from 0 hpf
CB11	46900.2		1.04871
CB12	48623.7
0 hpf		Avg	CI95%
CC1	66.9487	61.5485	0.924669
CC2	67.3608	Stdev	(+)CI95%
CC3	62.7467	3.87753	62.4731
CC4	61.3053	RSD	(-)CI95%
CC5	58.917	0.0629997	60.6238
CC6	59.5706
CC7	56.9307
CC8	58.6081
48 hpf		Avg	CI95%
CC9	68.854	66.683	0.664992
CC10	64.8604	Stdev	(+)CI95%
CC11	64.4552	2.7886	67.348
CC12	68.2937	RSD	(-)CI95%
CD1	69.0396	0.0418187	66.018
CD2	70.4827		% Increase from 0 hpf
CD3	64.6101		1.08342
CD4	62.8681
120 hpf		Avg	CI95%
CD5	62.4307	62.6923	0.36145
CD6	64.6239	Stdev	(+)CI95%
CD7	61.6064	1.51572	63.0537
CD8	62.5546	RSD	(-)CI95%
CD9	63.5451	0.0241771	62.3308
CD10	62.634		% Increase from 0 hpf
CD11	59.8829		1.01858
CD12	64.2608
0 hpf		Avg	CI95%
CE1	0.467404	0.468223	0.0123794
CE2	0.453092	Stdev	(+)CI95%
CE3	0.517572	0.0519121	0.480602
CE4	0.460711	RSD	(-)CI95%
CE5	0.480152	0.110871	0.455843
CE6	0.557165
CE7	0.41011
CE8	0.399575
48 hpf		Avg	CI95%
CE9	0.482516	0.455289	0.0205093
CE10	0.429103	Std. Dev.	(+)CI95%
CE11	0.336361	0.0804497	0.475798
CE12	0.464856	RSD	(-)CI95%
CF1	0.404215	0.1767	0.43478
CF2	0.59767		% Increase from 0 hpf
CF3	0.472303		0.972377
CF4	NF
120 hpf		Avg	CI95%
CF5	0.46347	0.488149	0.0465834
CF6	0.394448	Stdev	(+)CI95%
CF7	0.442569	0.195344	0.534733
CF8	0.390535	RSD	(-)CI95%
CF9	0.42199	0.400173	0.441566
CF10	0.401679		% Increase from 0 hpf
CF11	0.422777		1.04256
CF12	0.967725

## Sheet: Table S4
Supplementary Table 4. The number of features removed from the non-target datasets by each filter applied to the raw dataset
	HILIC	C18	Total
Starting features prior to filtering	6830	6117	12947
	Features removed in each filter
GapFilter	4093	4821	8914
batchCorr	2163	622	2785
ExpMetFilter#1_IntensityThreshold	196	404	600
ExpMetFilter#2_ramClustRFilter	0	0	0
ExpMetFilter#3_MassListRemoval	89	26	115
ExpMetFilter#4_BlankRatioFilter	191	103	294
ExpMetFilter#5_NegativeValues	3	0	3
Total number of removed features	6735	5976	12711
