# Supplementary material for: In-plate toxicometabolomics of single zebrafish embryos
Source: Royal Society of Chemistry journal article supplement (doi:10.1039/d0mo00007h), 2020-03-06
Supplement: d0mo00007h4.xlsx [file d0mo00007h4.xlsx]

## Sheet: Hidden
Template Version	4				Models
Analysis Name					Cont Rest Frequentist	Cont Unrest Frequentist	Cont Bayesian	Cont MA	Cont MA Wts	Dicho Rest Frequentist	Dicho Unrest Frequentist	Dicho Bayesian	Dicho MA	Dicho MA Wts	Nested Rest	Nested Unrest
Analysis Description					1,0,2,0,0	2,0,0,0,0	2,2,2,2,2	2,2,2,2,2		0,1,2,1,0,1,2,2,1	1,0,1,0,1,0,1,0,0	0,0,0,0,0,0,0,0,0	0,0,0,0,0,0,0,0,0	0,0,0,0,0,0,0,0,0	1,2	0,2
Chosen Model Type	1	BMDS Version	BMDS 3.1
App Location	C:\Users\antonribbenstedt\Desktop\ZFE\PropranololStudy\Results\Metabolomics\Analysis\AnalysisResults\AllTogether\Models\BMDS310\bmds3.xlsm	Output Dir	C:\Users\antonribbenstedt\Desktop\ZFE\PropranololStudy\Results\Metabolomics\Analysis\AnalysisResults\AllTogether\Models\BMDS310
1	DataSets				enable	name	dType	range	mscomboDeg	mscomboBgType	mscomboBg	contAdvDir	OptionSets
	DataSet Name1				1	DataSet Name1	2	$B$7:$E$17				1	Continuous	1
	[Add user notes here]												BMRType	1
	Dose	N	Mean	Std. Dev.									BMRF	1
	[Dose]	[N]	[Mean]	[Std. Dev.]									Tail Prob	0.01
	1e-06	12	0.373014	0.506382									ConfLevel	0.95
	1.69897	11	2.09741	1.95723									Dist	2
	2.69108	11	2.19691	1.93127									Variance	1
	4.07809	12	3.07822	2.28927									PolyRest	0
	4.79267	11	4.71182	1.51685									Background	0
	6.65792	10	6.40149	1.00102
	7.66779	9	7.4443	0.168522									Dichotomous	1
													RiskType	1
													BMR	0.1
													ConfLevel	0.95
													BackgroundType	1
													Background	-9999
													MSCombo	1
													RiskType	1
													BMR	0.1
													ConfLevel	0.95
													Nested	1
													RiskType	1
													BMR	0.1
													ConfLevel	0.95
													LSC	1
													BackgroundType	1
													Background	-9999
													Iterations	1000
													SeedType	1
													Seed	-9999
													Logic Settings
													TRUE
													FALSE
													3
													On	On	On	N/A	Unusable Bin	BMD not estimated
													On	On	On	N/A	Unusable Bin	BMDL not estimated
													Off	Off	Off	N/A	No Bin Change (Warning)	BMDU not estimated
													On	On	On	N/A	Unusable Bin	AIC not estimated
													On	Off	Off	0.05	Questionable Bin	Constant variance test failed (Test 2 p-value < 0.05)
													On	Off	Off	0.05	Questionable Bin	Non-constant variance test failed (Test 3 p-value < 0.05)
													On	On	On	0.1	Questionable Bin	Goodness of fit p-value < 0.1
													Off	On	Off	0.05	Questionable Bin	Goodness of fit p-value < 0.05
													On	On	On	20	Questionable Bin	BMD/BMDL ratio > 20
													On	On	On	5	No Bin Change (Warning)	BMD/BMDL ratio > 5
													On	On	On	2	Questionable Bin	|Residual for Dose Group Near BMD| > 2
													Off	Off	Off	N/A	No Bin Change (Warning)	BMDS output file included warning
													On	On	On	1	No Bin Change (Warning)	BMD higher than maximum dose
													On	On	On	1	No Bin Change (Warning)	BMDL higher than maximum dose
													On	On	On	3	No Bin Change (Warning)	BMD 3x lower than lowest non-zero dose
													On	On	On	3	No Bin Change (Warning)	BMDL 3x lower than lowest non-zero dose
													On	On	On	10	Questionable Bin	BMD 10x lower than lowest non-zero dose
													On	On	On	10	Questionable Bin	BMDL 10x lower than lowest non-zero dose
													On	On	On	2	No Bin Change (Warning)	|Residual at control| > 2
													On	Off	Off	1.5	No Bin Change (Warning)	Modeled control response std. dev. >|1.5| actual response std. dev.
													On	On	On	NA	Questionable Bin	d.f.=0, saturated model (Goodness of fit test cannot be calculated)
													Report Settings
													Continuous Input	1,1,1,1,1,1,1,1,1,1,1,1,1,1,1,1
													Continuous Output	1,1,1,1,1,1,2,1,1,1
													Dichotomous Input	1,1,1,1,1,1,1,1,1,1,1,1
													Dichotomous Output	1,1,1,1,1,1,1,1,2,1,1
													MSCombo Input	1,1,1,1,1
													MSCombo Output	1,1,1,1
													Nested Input	1,1,1,1,1,1,1,1,1,1,1,1,1,1
													Nested Output	1,1,1,1,1,1,1,2,1,1,1,1,1,1,1,1
													Print Data Page	1
													Print Info Page	1
													Print Summary Results	1
													Print Summary Chart	1
													Print Model Result	1
													Print Model Chart	1
													Print All Models	1

## Sheet: Summary
						BMDS 3.1
	DataSet Name1					Analysis Name
	[Add user notes here]										Color Key
	Dose	N	Mean	Std. Dev.		Analysis Description					Recommended frequentist model
	[Dose]	[N]	[Mean]	[Std. Dev.]							Model averaging
	1e-06	12	0.373014	0.506382
	1.69897	11	2.09741	1.95723
	2.69108	11	2.19691	1.93127
	4.07809	12	3.07822	2.28927
	4.79267	11	4.71182	1.51685
	6.65792	10	6.40149	1.00102
	7.66779	9	7.4443	0.168522
																		Standard Excel tools can be used to expand or modify graphs
	Option set #1		Scroll right to see summary plot ->
	Model	Analysis Type	Restriction	RiskType	BMRF	BMD	BMDL	BMDU	Test 4 P‑Value	AIC	Unnormalized Log Posterior Probability	Scaled Residual for Dose Group near BMD	Scaled Residual for Control Dose Group	BMDS Recommendation	BMDS Recommendation Notes
	Exponential 2 (CV)	frequentist	Restricted	Std. Dev.	1	1.7324	1.45568	2.13017	0.000110504	287.316	-	5.52184	-0.230658	Questionable	_x000D_ Constant variance test failed (Test 2 p-value < 0.05)_x000D_ Goodness of fit p-value < 0.1_x000D_ |Residual for Dose Group Near BMD| > 2
	Exponential 3 (CV)	frequentist	Restricted	Std. Dev.	1	1.73236	1.45568	2.13017	0.000110504	287.316	-	5.52174	-0.230555	Questionable	_x000D_ Constant variance test failed (Test 2 p-value < 0.05)_x000D_ Goodness of fit p-value < 0.1_x000D_ |Residual for Dose Group Near BMD| > 2
	Exponential 4 (CV)	frequentist	Restricted	Std. Dev.	1	0.270271	0.215524	0.405859	0.109131	271.354	-	0.823342	0.823342	Questionable	_x000D_ Constant variance test failed (Test 2 p-value < 0.05)
	Exponential 5 (CV)	frequentist	Restricted	Std. Dev.	1	0.484569	0.33808	0.759683	0.142452	271.232	-	0.799768	0.799768	Questionable	_x000D_ Constant variance test failed (Test 2 p-value < 0.05)

## Sheet: Abbreviations
Dichotomous Models
Abbreviation	Model Name
dhl	Dichotomous Hill
gam	Gamma
log	Logistic
lnl	Log-Logistic
lnp	Log-Probit
mst	Multistage
pro	Probit
qln	Quantal Linear
wei	Weibull

## Sheet: freq-exp2-rest-opt1
			Continuous Results
							BMDS 3.1
		Return to Summary
	User Input					Model Results
		Info					Benchmark Dose
		Model	frequentist Exponential degree 2 v1.0				BMD	1.7324
		Dataset Name	DataSet Name1				BMDL	1.45568
		User notes	[Add user notes here]				BMDU	2.13017
							AIC	287.316
		Dose-Response Model	P[dose] = a * exp(sign * b * dose)				Test 4 P-value	0.000110504
		Variance Model	Var[i] = alpha				D.O.F.	5
		Model Options					Model Parameters
		BMR Type	Std. Dev.				# of Parameters	3
		BMRF	1				Variable	Estimate
		Tail Probability	-				a	0.422108
		Confidence Level	0.95				b	0.425601
		Distribution Type	Log-normal				log-alpha	-0.609495
		Variance Type	Constant
							Goodness of Fit
		Model Data					Dose	Size	Estimated Mean	Observed Mean	Estimated Std Dev	Observed Std Dev	Scaled Residual
		Dependent Variable	[Dose]				1e-06	12	0.422108	0.373014	0.737309	0.506382	-0.230658
		Independent Variable	[Mean]				1.69897	11	0.86987	2.09741	0.737309	1.95723	5.52184
		Total # of Observations	7				2.69108	11	1.32688	2.19691	0.737309	1.93127	3.91365
		Adverse Direction	Automatic				4.07809	12	2.39443	3.07822	0.737309	2.28927	3.21262
							4.79267	11	3.24551	4.71182	0.737309	1.51685	6.59589
							6.65792	10	7.17872	6.40149	0.737309	1.00102	-3.33351
							7.66779	9	11.0334	7.4443	0.737309	0.168522	-14.6034
							Likelihoods of Interest
							Model	Log Likelihood*	# of Parameters	AIC
							A1	-127.897	8	271.795
							A2	-84.3921	14	196.784
							A3	-127.897	8	271.795
							fitted	-140.658	3	287.316
							R	-182.8	2	369.599
							* Includes additive constant of -69.83933. This constant was not included in the LL derivation prior to BMDS 3.0.
							Tests of Interest
							Test	-2*Log(Likelihood Ratio)	Test df	p-value
							1	196.815	12	<0.0001
							2	87.0105	6	<0.0001
							3	87.0105	6	<0.0001
							4	25.5208	5	0.000110504

## Sheet: freq-exp3-rest-opt1
			Continuous Results
							BMDS 3.1
		Return to Summary
	User Input					Model Results
		Info					Benchmark Dose
		Model	frequentist Exponential degree 3 v1.0				BMD	1.73236
		Dataset Name	DataSet Name1				BMDL	1.45568
		User notes	[Add user notes here]				BMDU	2.13017
							AIC	287.316
		Dose-Response Model	P[dose] = a * exp(sign * (b * dose)^d)				Test 4 P-value	0.000110504
		Variance Model	Var[i] = alpha				D.O.F.	5
		Model Options					Model Parameters
		BMR Type	Std. Dev.				# of Parameters	4
		BMRF	1				Variable	Estimate
		Tail Probability	-				a	0.422087
		Confidence Level	0.95				b	0.425621
		Distribution Type	Log-normal				d	1
		Variance Type	Constant				log-alpha	-0.609437
		Model Data					Goodness of Fit
		Dependent Variable	[Dose]				Dose	Size	Estimated Mean	Observed Mean	Estimated Std Dev	Observed Std Dev	Scaled Residual
		Independent Variable	[Mean]				1e-06	12	0.422087	0.373014	0.737331	0.506382	-0.230555
		Total # of Observations	7				1.69897	11	0.869858	2.09741	0.737331	1.95723	5.52174
		Adverse Direction	Automatic				2.69108	11	1.32689	2.19691	0.737331	1.93127	3.9135
							4.07809	12	2.39451	3.07822	0.737331	2.28927	3.21214
							4.79267	11	3.24567	4.71182	0.737331	1.51685	6.59498
							6.65792	10	7.17935	6.40149	0.737331	1.00102	-3.3361
							7.66779	9	11.0346	7.4443	0.737331	0.168522	-14.6078
							Likelihoods of Interest
							Model	Log Likelihood*	# of Parameters	AIC
							A1	-127.897	8	271.795
							A2	-84.3921	14	196.784
							A3	-127.897	8	271.795
							fitted	-140.658	3	287.316
							R	-182.8	2	369.599
							* Includes additive constant of -69.83933. This constant was not included in the LL derivation prior to BMDS 3.0.
							Tests of Interest
							Test	-2*Log(Likelihood Ratio)	Test df	p-value
							1	196.815	12	<0.0001
							2	87.0105	6	<0.0001
							3	87.0105	6	<0.0001
							4	25.5208	5	0.000110504

## Sheet: freq-exp4-rest-opt1
			Continuous Results
							BMDS 3.1
		Return to Summary
	User Input					Model Results
		Info					Benchmark Dose
		Model	frequentist Exponential degree 4 v1.0				BMD	0.270271
		Dataset Name	DataSet Name1				BMDL	0.215524
		User notes	[Add user notes here]				BMDU	0.405859
							AIC	271.354
		Dose-Response Model	P[dose] = a * [c-(c-1) * exp(-b * dose)]				Test 4 P-value	0.109131
		Variance Model	Var[i] = alpha				D.O.F.	4
		Model Options					Model Parameters
		BMR Type	Std. Dev.				# of Parameters	4
		BMRF	1				Variable	Estimate
		Tail Probability	-				a	0.217298
		Confidence Level	0.95				b	0.000208799
		Distribution Type	Log-normal				c	16400.4
		Variance Type	Constant				log-alpha	-0.845783
		Model Data					Goodness of Fit
		Dependent Variable	[Dose]				Dose	Size	Estimated Mean	Observed Mean	Estimated Std Dev	Observed Std Dev	Scaled Residual
		Independent Variable	[Mean]				1e-06	12	0.217299	0.373014	0.65515	0.506382	0.823342
		Total # of Observations	7				1.69897	11	1.48122	2.09741	0.65515	1.95723	3.11941
		Adverse Direction	Automatic				2.69108	11	2.21908	2.19691	0.65515	1.93127	-0.11222
							4.07809	12	3.25038	3.07822	0.65515	2.28927	-0.910339
							4.79267	11	3.78159	4.71182	0.65515	1.51685	4.7092
							6.65792	10	5.1678	6.40149	0.65515	1.00102	5.95478
							7.66779	9	5.91809	7.4443	0.65515	0.168522	6.98869
							Likelihoods of Interest
							Model	Log Likelihood*	# of Parameters	AIC
							A1	-127.897	8	271.795
							A2	-84.3921	14	196.784
							A3	-127.897	8	271.795
							fitted	-131.677	4	271.354
							R	-182.8	2	369.599
							* Includes additive constant of -69.83933. This constant was not included in the LL derivation prior to BMDS 3.0.
							Tests of Interest
							Test	-2*Log(Likelihood Ratio)	Test df	p-value
							1	196.815	12	<0.0001
							2	87.0105	6	<0.0001
							3	87.0105	6	<0.0001
							4	7.55912	4	0.109131

## Sheet: freq-exp5-rest-opt1
			Continuous Results
							BMDS 3.1
		Return to Summary
	User Input					Model Results
		Info					Benchmark Dose
		Model	frequentist Exponential degree 5 v1.0				BMD	0.484569
		Dataset Name	DataSet Name1				BMDL	0.33808
		User notes	[Add user notes here]				BMDU	0.759683
							AIC	271.232
		Dose-Response Model	P[dose] = a * [c-(c-1) * exp(-(b * dose)^d)]				Test 4 P-value	0.142452
		Variance Model	Var[i] = alpha				D.O.F.	3
		Model Options					Model Parameters
		BMR Type	Std. Dev.				# of Parameters	5
		BMRF	1				Variable	Estimate
		Tail Probability	-				a	0.223853
		Confidence Level	0.95				b	0.000570314
		Distribution Type	Log-normal				c	28934.4
		Variance Type	Constant				d	1.26549
							log-alpha	-0.873693
		Model Data
		Dependent Variable	[Dose]				Goodness of Fit
		Independent Variable	[Mean]				Dose	Size	Estimated Mean	Observed Mean	Estimated Std Dev	Observed Std Dev	Scaled Residual
		Total # of Observations	7				1e-06	12	0.223853	0.373014	0.64607	0.506382	0.799768
		Adverse Direction	Automatic				1.69897	11	1.21815	2.09741	0.64607	1.95723	4.51375
							2.69108	11	2.0032	2.19691	0.64607	1.93127	0.994461
							4.07809	12	3.23463	3.07822	0.64607	2.28927	-0.838647
							4.79267	11	3.91696	4.71182	0.64607	1.51685	4.08042
							6.65792	10	5.82131	6.40149	0.64607	1.00102	2.83975
							7.66779	9	6.91606	7.4443	0.64607	0.168522	2.45288
							Likelihoods of Interest
							Model	Log Likelihood*	# of Parameters	AIC
							A1	-127.897	8	271.795
							A2	-84.3921	14	196.784
							A3	-127.897	8	271.795
							fitted	-130.616	5	271.232
							R	-182.8	2	369.599
							* Includes additive constant of -69.83933. This constant was not included in the LL derivation prior to BMDS 3.0.
							Tests of Interest
							Test	-2*Log(Likelihood Ratio)	Test df	p-value
							1	196.815	12	<0.0001
							2	87.0105	6	<0.0001
							3	87.0105	6	<0.0001
							4	5.43706	3	0.142452
